# Supplementary material
Source: PubMed Central journal article supplement (PMC3393503)
Supplement: supp_194.14.3601_FigS1.pdf [file supp_194.14.3601_FigS1.pdf]

## Supplementary Information

Stress survival profiles of the *Bacillus subtilis* wild type 168, a *sigB* mutant and selected mutant strains in response to paraquat and hydrogen peroxide (H<sub>2</sub>O<sub>2</sub>) stress.

**Fig. 1**

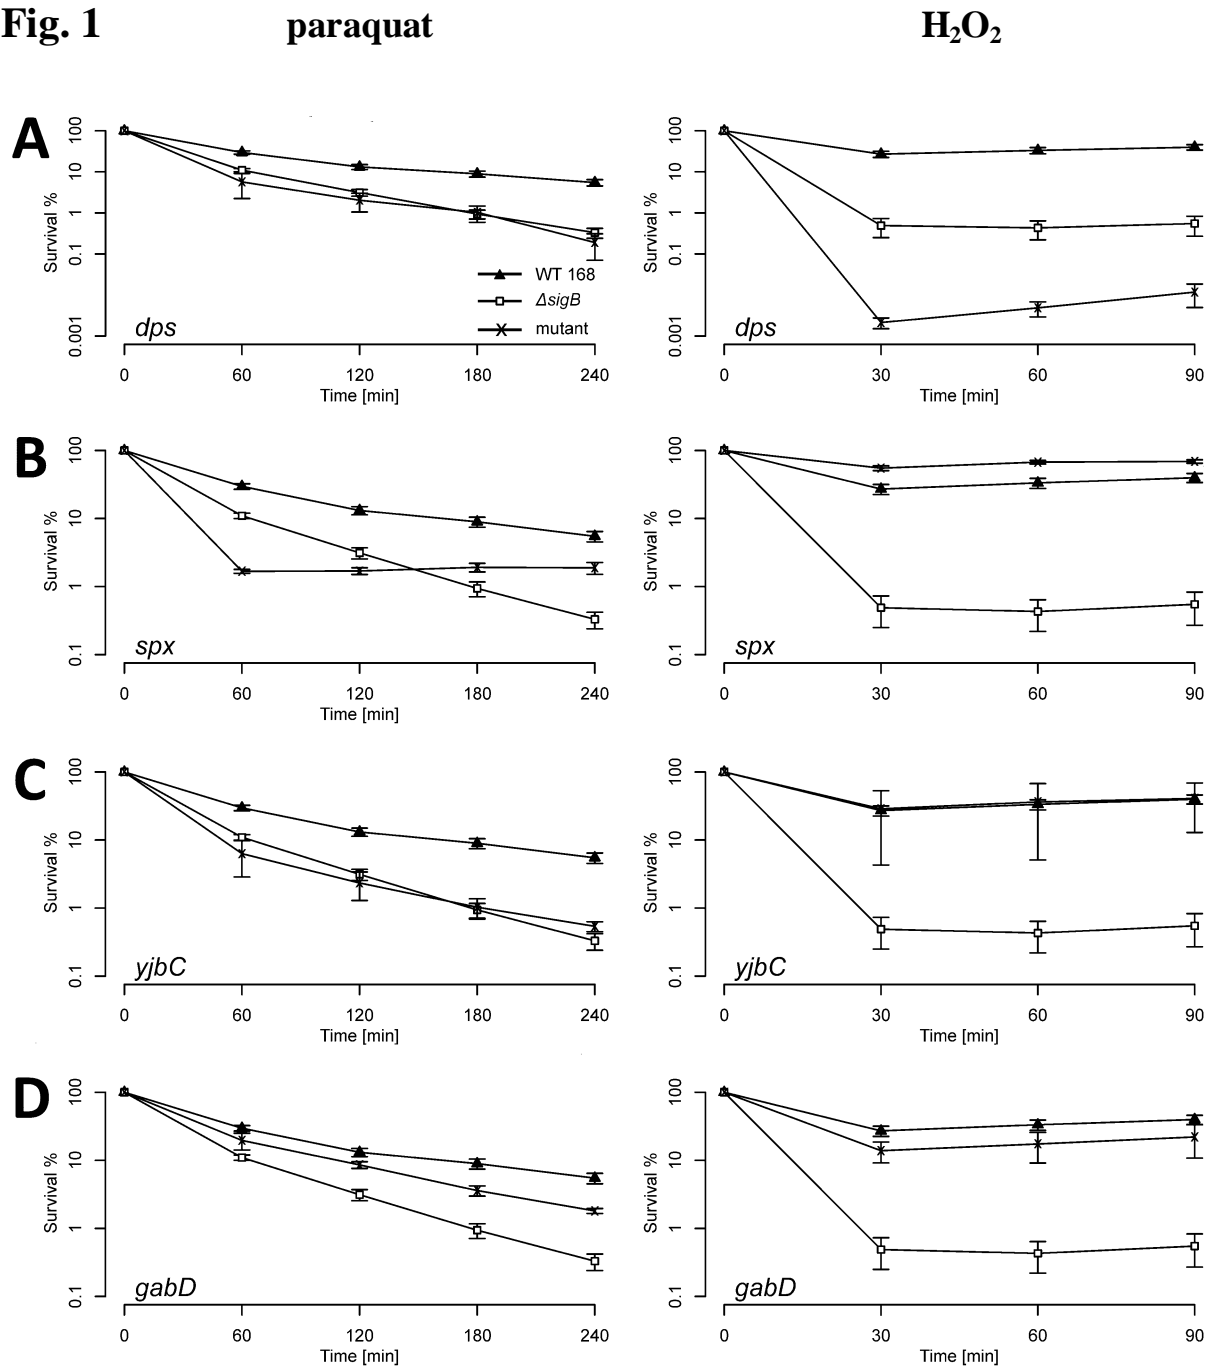

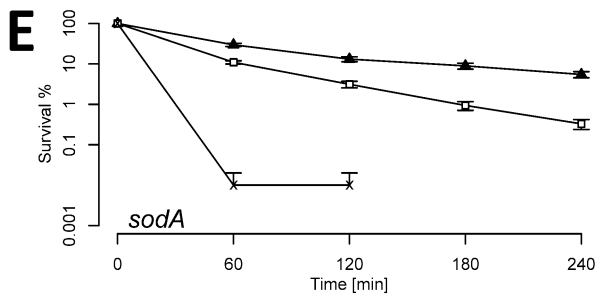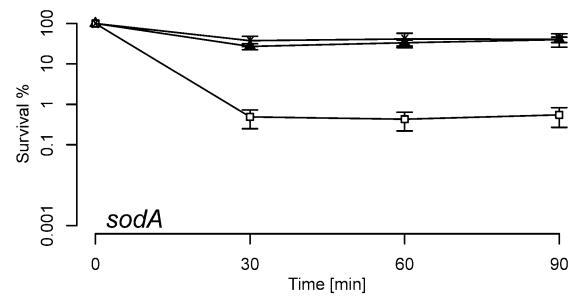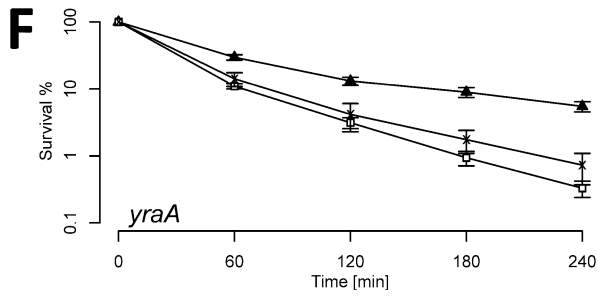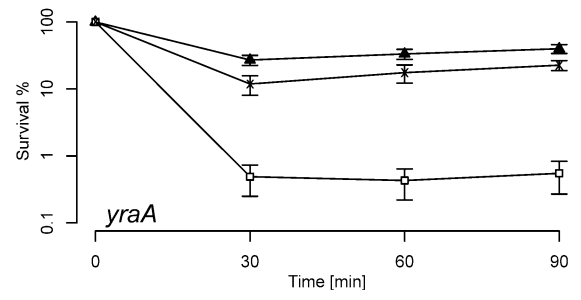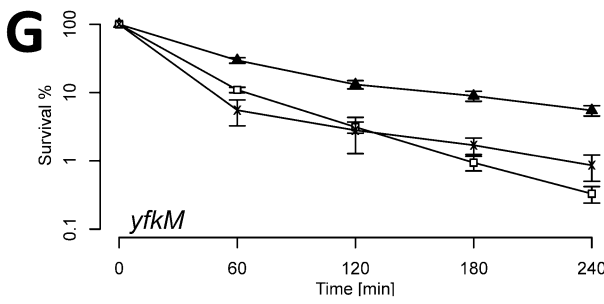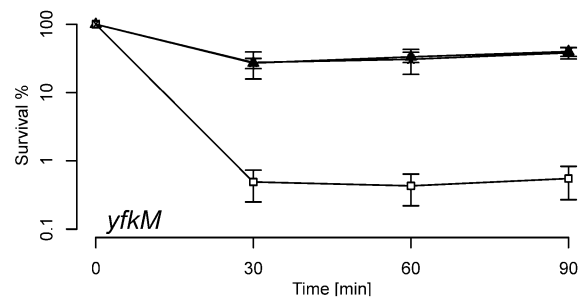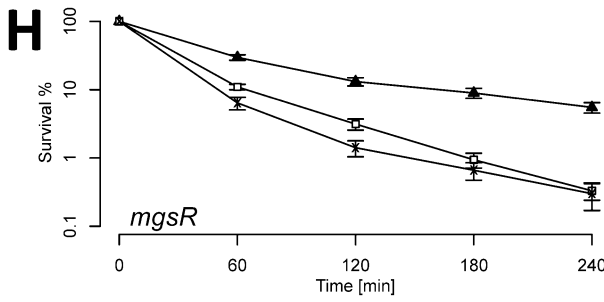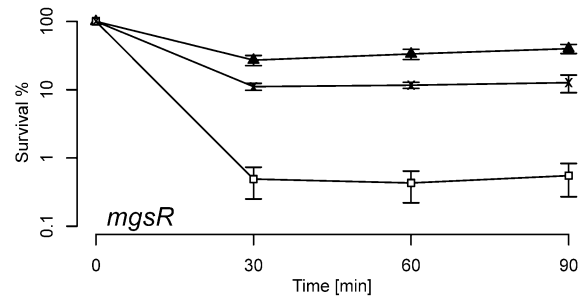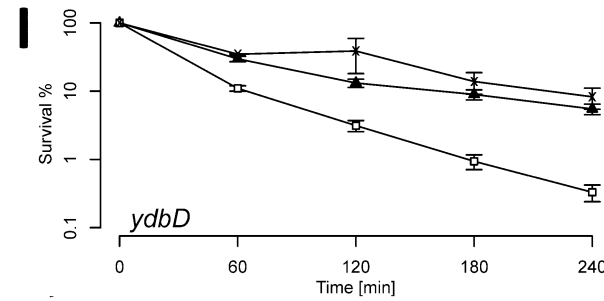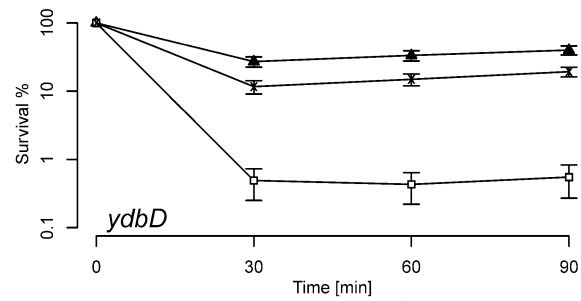

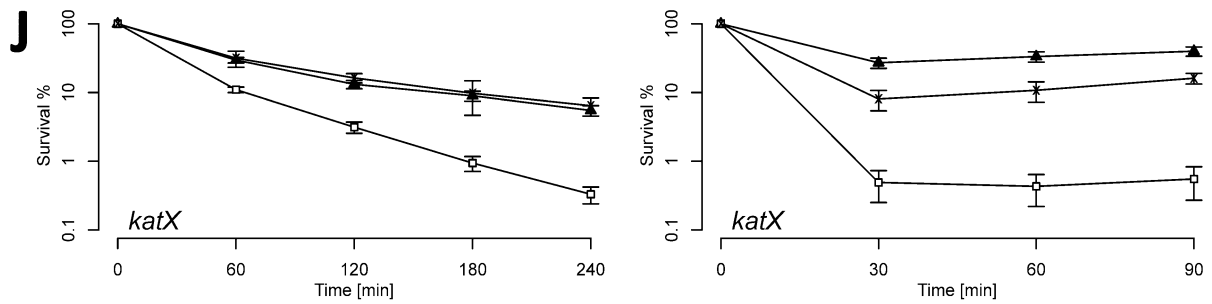

Comparative analysis of the oxidative stress resistance of the wild type 168 (filled triangles), its isogenic *sigB* mutant ML6 (open squares) and chosen mutant strains (x symbol) in response to 100 mM paraquat (left panel) or 5 mM H<sub>2</sub>O<sub>2</sub> (right panel). Shown are the survival rates of mutants in (A) *dps*, (B) *spx*, (C) *yjbC*, (D) *gabD*, (E) *sodA*, (F) *yraA*, (G) *yfkM*, (H) *mgsR*, (I) *ydbD* and (J) *katX*. All strains were cultivated in synthetic medium and growth was monitored by measuring the OD<sub>500</sub>. At OD<sub>500</sub> = 0.4 (t-20 min) the cells were treated with 2% ethanol followed by a preadaptation period of 20 min. After preadaptation (time zero t<sub>0</sub>) the cells were stressed with paraquat or H<sub>2</sub>O<sub>2</sub>. Survival rates were determined by plating appropriate dilutions of control samples taken before oxidative stress treatment at t<sub>0</sub> and after 60, 120, 180, and 240 min for the paraquat stressed cells and after 30, 60, and 90 min for the H<sub>2</sub>O<sub>2</sub> stressed cells. The values are arithmetic means and standard errors of the means.
